# Supplementary material
Source: publisher figshare collection journal article supplement (https://karger.figshare.com/ndownloader/files/15342662)
Supplement: Supplementary file 1 [file 15342662]

**Low platelet counts at diagnosis predict better survival for patients with intermediate-risk acute myeloid leukemia**

Yimin Zhang, M.D., Haihui Gu, M.D., Qi Chen, Ph.D., Ying Zhang, M.D., Hui Cheng, B.S., Jianmin Yang, M.D., Jianmin Wang, M.D., and Xiaoxia Hu, M.D.

**Materials and Methods**

**List of the analyzed fusion genes.**

The complete list of the fusion genes that were analyzed in this study: BCR-ABL, SIL-TAL1, E2A-HLF, TEL-RUNX1, E2A-PBX1, RUNX1-RUNX1T1, PML-RARa, CBFβ-MYH11, DEK-CAN, NPM-RARa, FIP1L1-RARa, PRKAR1A-RARa, NUMA1-RARa, PLZF-RARa, STAT5b-RARa, NPM-MLF1, TEL-PDGFRB, FIP1L1-PDGFRA, RUNX1-MDS1, RUNX1-EVI1, RUNX1-MTG16, TEL-ABL, ETV6-PDGFRA, NUP98-HoxA13, NUP98-HoxC11, NUP98-HoxD13, NUP98-HoxA9, NUP98-HoxA11, NUP98 –PMX1, TEL-JAK2, MLL-AF4, MLL-AF6, MLL-AF9, MLL-AF10, MLL-AF17, MLL-AF1q, MLL-AF1p, MLL-AFX, MLL-SEPT6, MLL-ELL, MLL-ENL, NPM-ALK, SET-CAN, TLS-ERG.

**Next-generation sequencing**

Gene mutations were assigned to functional groups according to previous reports: DNA methylation and hydroxymethylation-related─DNMT3A, TET2 and IDH1/2; RNA spliceosome─SF3B1, SRSF2, ZRSR2 and U2AF1; chromatin remodeling─ASXL1, EZH2, BCOR and KMT2A; transcriptional deregulation─CEBPA, RUNX1 and WT1; activated signaling─NRAS, KRAS, CBL, KIT, JAK2 and FLT3. Read pairs were aligned to Refseq hg19 (downloaded from the UCSC Genome Browser, URLs) by the Burrows–Wheeler Aligner version 0.7.13-r1126. Samtools version 1.3 was used to generate chromosomal coordinate-sorted BAM files. We used targeted next-generation sequencing with the Rightongene AML/MDS/MPN Sequencing Panel (Rightongene). The NGS libraries were paired-end sequenced (2× 150 bp) on an Illumina MiSeq System (Illumina, San Diego, CA). The mean depth of each sample was 2500×, with an average 5% of the target sequence being covered sufficiently deeply for variant calling. Samtools mpileup was applied for SNV/indel calling and filter workflow.

**Supplementary Table 1. Characteristics of all and intermediate** risk AML patients induced with standard regimen.

| **Characteristics** | **PLT≤40×109/L** | **PLT>40×109/L** | ***P* value** |
| --- | --- | --- | --- |
| **All patients** | **n=131** | **n=128** |  |
| Gender, n (%) |  |  | 0.535 |
| Male | 68 (51.91%) | 61 (47.66%) |  |
| Female | 63 (48.09%) | 67 (52.34%) |  |
| Median age, years (range) | 39 (16-59) | 40 (16-59) | 0.276 |
| WBC (×109/L), median [range] | 5.27 (0.56-271.25） | 6.12 (0.47-281.02) | 0.796 |
| Hb (g/L), median [range] | 75.5 (17.5-125.0) | 85.0 (45.0-149.0) | 0.812 |
| BM blast (%), median [range] | 62.7 (21.5-97.5) | 65.5 (14.5-96.0) | 0.675 |
| MK, median [range]/1.5×3cm2 | 20 (0-115) | 73 (0-190) | 0.041* |
| LDH (U/L), median [range] | 615 (98-2154) | 721 (93-2652) | 0.642 |
| ECOG performance status at diagnosis, n (%) |  |  | 0.228 |
| ≤1 | 23 (17.56%) | 60 (46.88%) |  |
| 2 | 90 (68.70%) | 55 (42.97%) |  |
| 3 | 18 (13.74%) | 13 (10.15%) |  |
| Spleen size by B-ultrasound |  |  |  |
| Length (cm), median [range] | 11.2 (8.5-15.6) | 10.8 (8.0-15.5) | 1.000 |
| Thickness (cm), median [range] | 4.7 (3.5-6.7) | 4.4 (3.2-6.5) | 1.000 |
| ELN risk group, n (%) |  |  | 0.262 |
| Favorable | 45 (34.35%) | 25 (19.53%) |  |
| Intermediate | 69 (52.67%) | 86 (67.19%) |  |
| Unfavorable | 17 (12.98%) | 17 (13.28%) |  |
| Induction chemotherapy regimen, n (%) |  |  | 0.393 |
| DA | 60 (45.80%) | 69 (53.91%) | 0.215 |
| IDA | 61 (46.56%) | 52 (40.63%) | 0.381 |
| MA | 10 (7.64%) | 7 (5.46%) | 0.618 |
| TRM after 1-2 cycles of induction chemotherapy, n (%) | 3 (2.29%) | 2 (1.56%) | 0.825 |
| CNS involvement, n (%) | 1 (0.76%) | 2 (1.56%) | 0.736 |
| **Intermediate risk patients** | **n=69** | **n=86** |  |
| Gender, n (%) |  |  | 0.833 |
| Male | 32 (46.38%) | 42 (48.84%) |  |
| Female | 37 (53.62%) | 44 (51.16%) |  |
| Median age, years (range) | 38 (16-59) | 41 (16-59) | 0.316 |
| WBC (×109/L), median [range] | 7.02 (0.76-212.77） | 6.50 (0.37-264.20) | 0.751 |
| Hb (g/L), median [range] | 79.0 (8.5-130.5) | 82.0 (46.5-146.5) | 0.793 |
| BM blast (%), median [range] | 70.0 (20.5-96.5) | 65.0 (14.5-95.0) | 0.694 |
| MK, median [range]/1.5×3cm2 | 20 (0-124) | 63 (0-200) | 0.024* |
| LDH (U/L), median [range] | 541 (91-3125) | 589 (98-2713) | 0.678 |
| ECOG performance status at diagnosis, n (%) |  |  | 0.313 |
| ≤1 | 13 (18.84%) | 38 (44.19%) |  |
| 2 | 46 (66.67%) | 37 (43.02%) |  |
| 3 | 10 (14.49%) | 11 (12.79%) |  |
| Spleen size by B-ultrasound |  |  |  |
| Length (cm), median [range] | 12.5 (8.5-15.9) | 11.0 (8.0-16.5) | 1.000 |
| Thickness (cm), median [range] | 5.0 (3.5-6.5) | 4.7 (3.2-6.2) | 1.000 |
| Induction chemotherapy regimen, n (%) |  |  | 0.930 |
| DA | 31 (44.93%) | 38 (44.19%) | 0.926 |
| IDA | 35 (50.72%) | 43 (50.00%) | 0.929 |
| MA | 3 (4.35%) | 5 (5.81%) | 0.733 |
| TRM after 1-2 cycles of induction chemotherapy, n (%) | 2 (2.90%) | 1 (1.16%) | 0.582 |
| CNS involvement, n (%) | 0 | 1 (1.16%) | 0.369 |

Abbreviation: PLT, platelet; WBC, white blood cell; Hb, hemoglobin; BM, bone marrow; MK, megakaryocyte; LDH, lactate dehydrogenase; ECOG, Eastern Cooperative Oncology Group; ELN, European Leukemia Net; DA, daunorubicin and cytarabine; IDA, idarubicin and cytarabine; MA, mitoxantrone and cytarabine; CAG, granulocyte colony-stimulating factor and cytarabine and aclarubicin; TRM, treatment-related mortality; CNS, central nervous system; CIR, cumulative incidence of relapse; NRM, non-relapse mortality; CR/MRD-, complete remission with negative minimal residual disease; CR1, the first complete remission; SE, standard error. *P values of statistical significance.

**
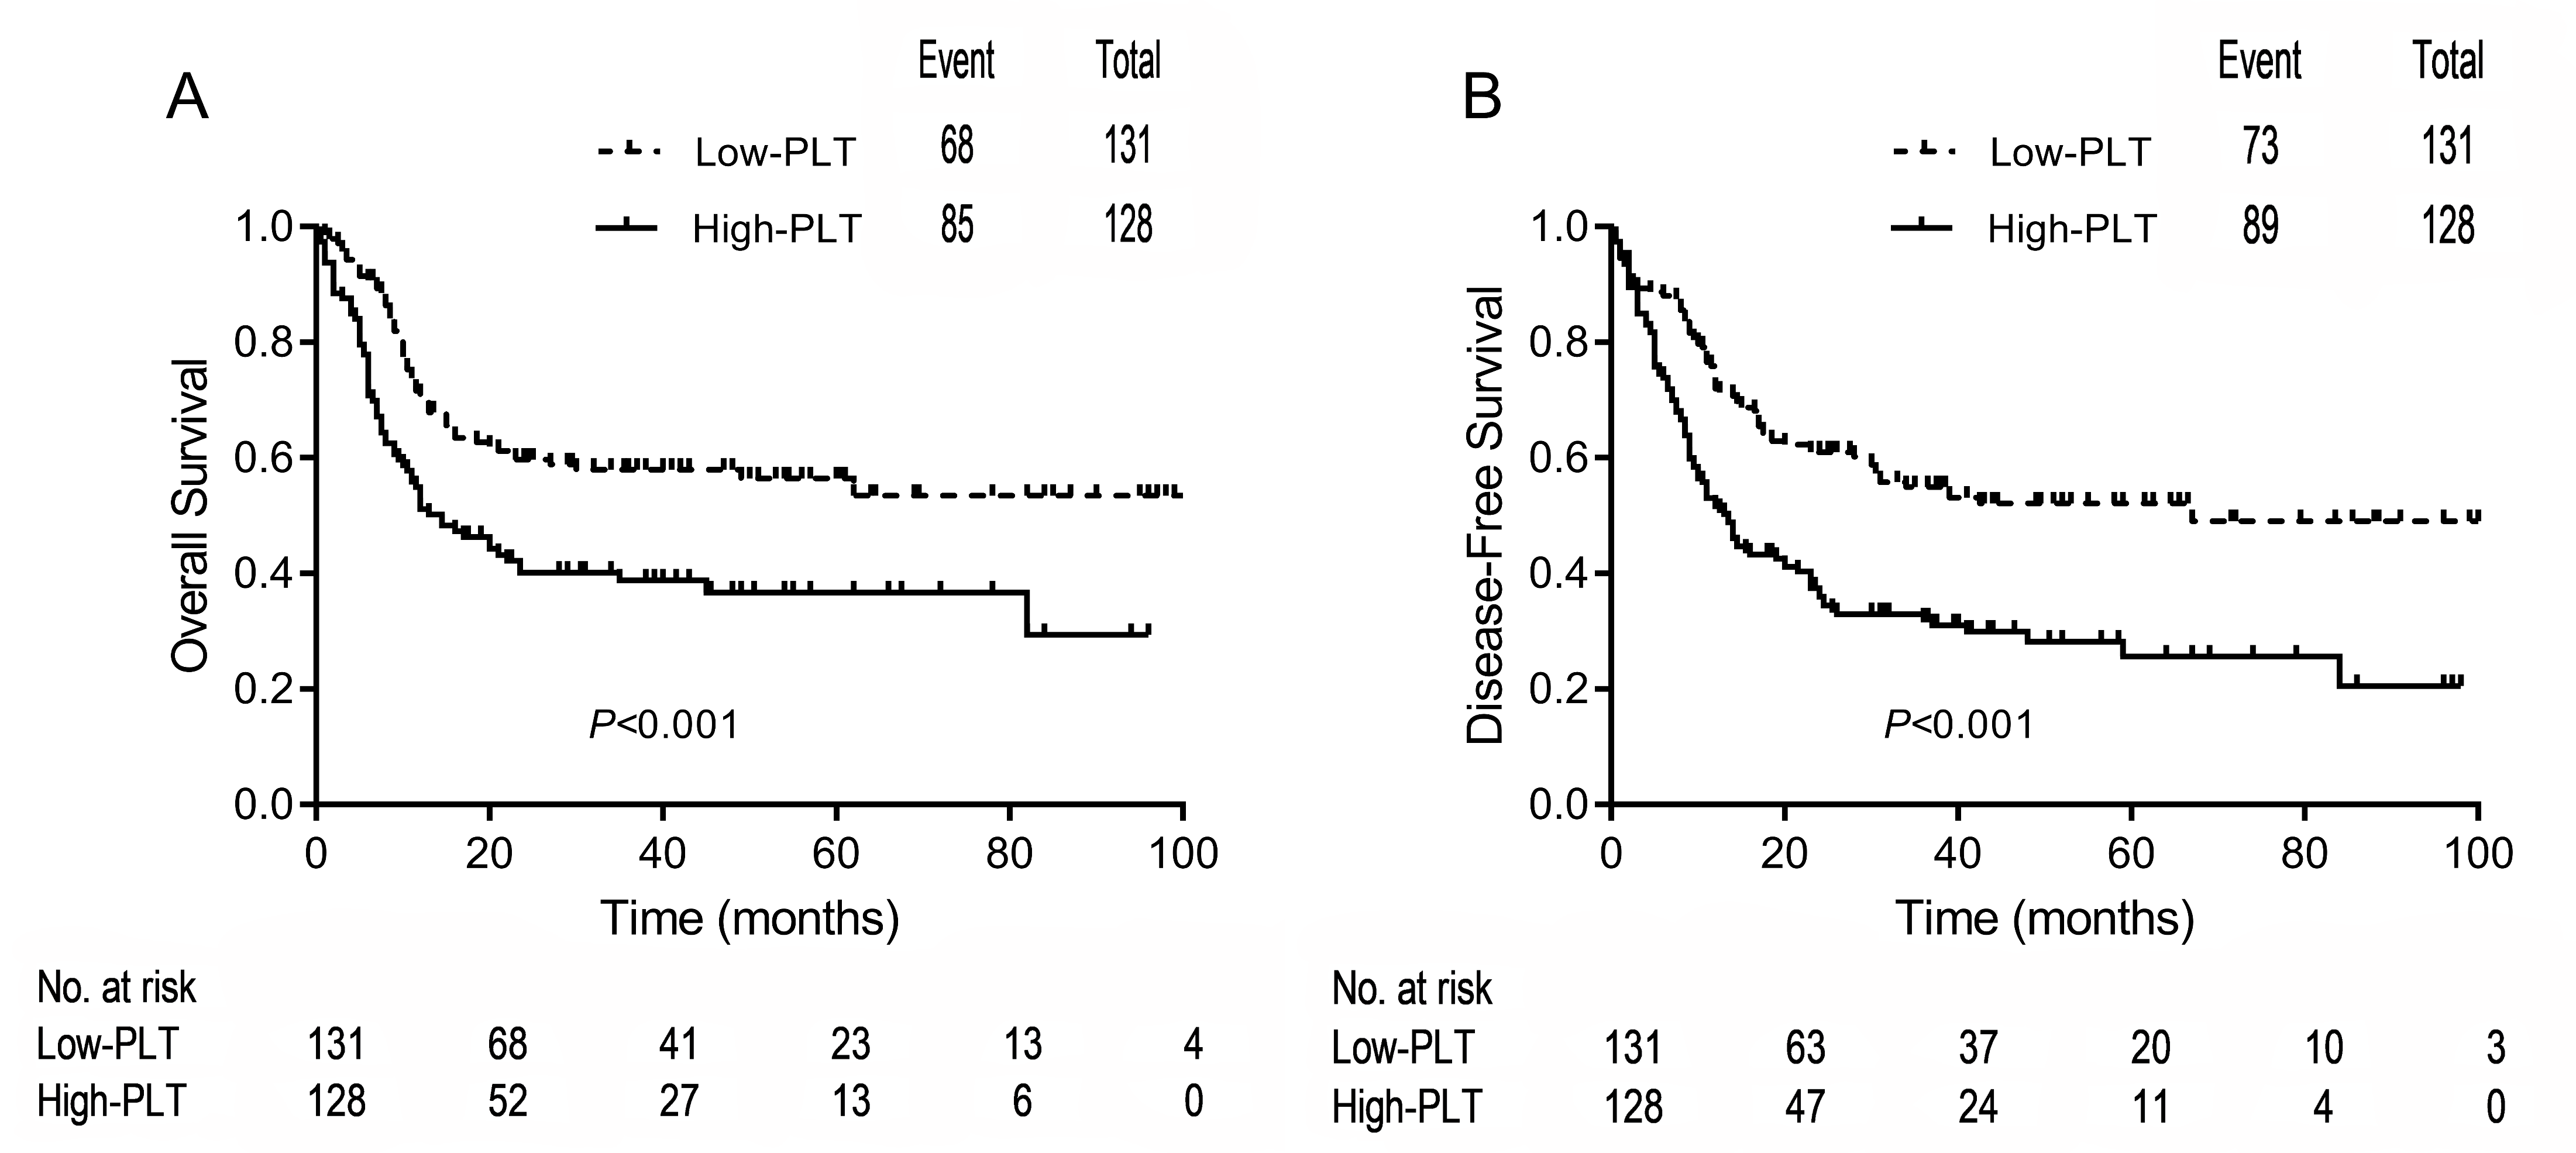
**

**Supplementary Figure S1. The outcomes of all AML patients induced with “3+7” regimen according to platelet (PLT) count (cutoff value*=*40×109/L).** Toeliminate the bias that CAG (granulocyte colony-stimulating factor [G-CSF]; cytarabine 10 mg/m2/12h by subcutaneous infusion from days 1 to 14; aclarubicin 10 mg/day by intravenous infusion from days 1 to 10) induction regimen may produce, the survival of AML patients were recalculated after excluding CAG-treated patients. The Kaplan-Meier (K-M) curves were plotted to show the difference of overall survival (OS) and disease-free survival (DFS) between the low and high PLT groups. (**A**) 5-year OS rate (54.1±4.5% versus 33.0±4.2%, *P*<0.001). (**B**) 5-year DFS rate (48.1±3.5% versus 26.3±3.0%, *P*<0.001).


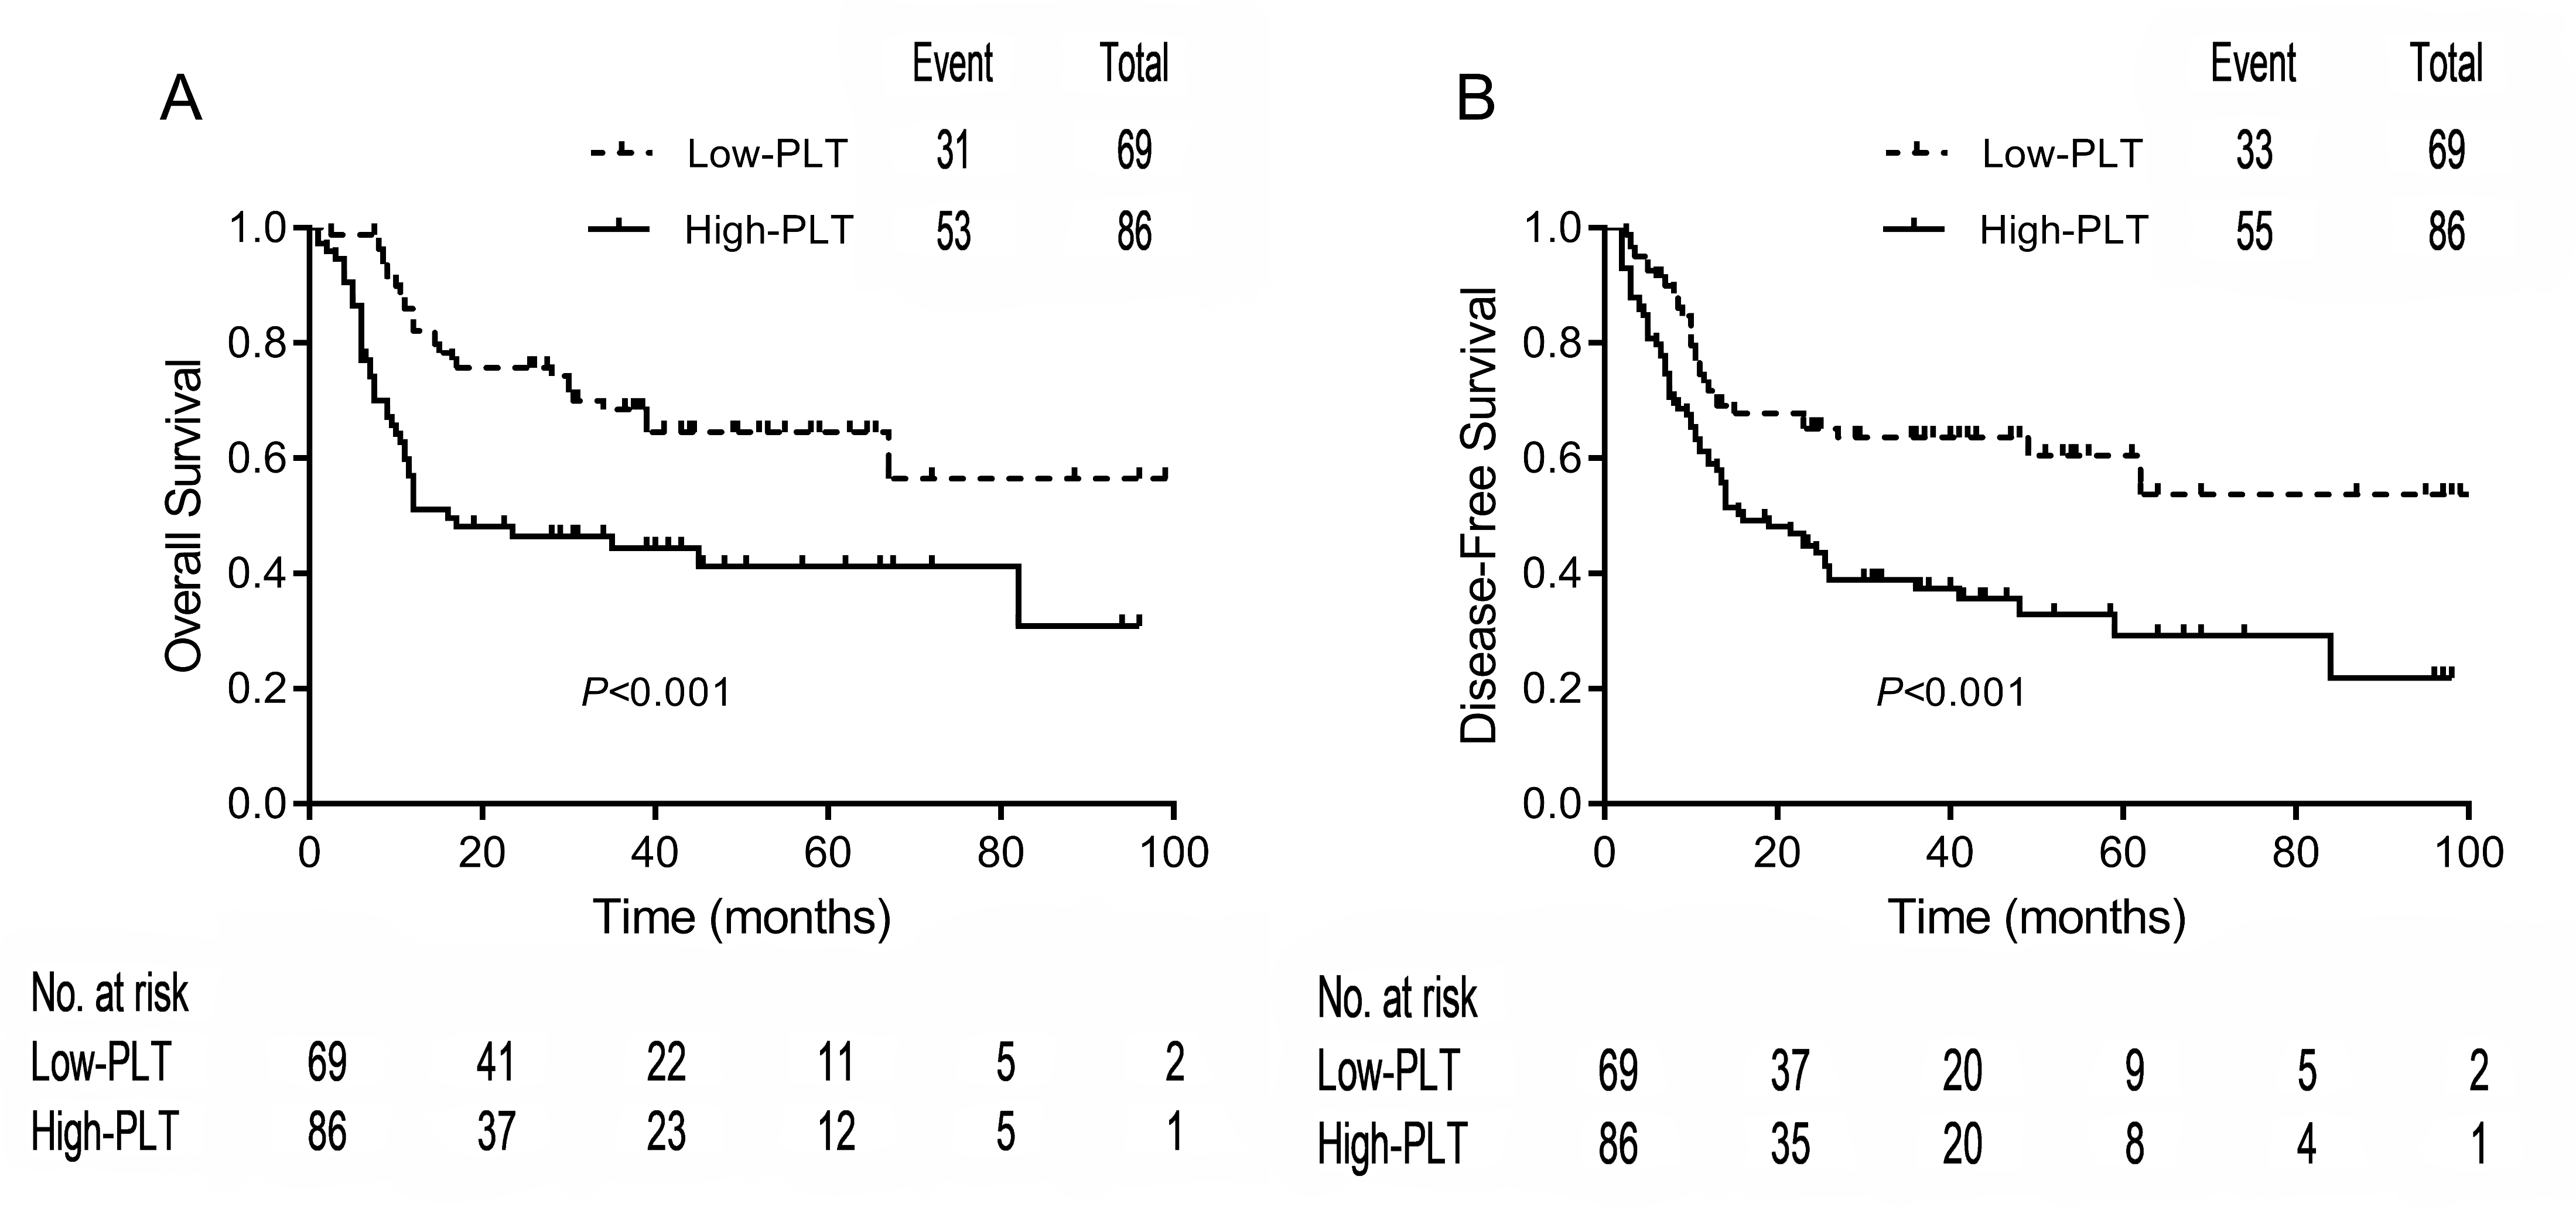


**Supplementary Figure S2. The outcomes of intermediate risk AML patients induced with “3+7” regimen according to PLT count (cutoff value*=*40×109/L).** Toeliminate the bias that CAG induction regimen may produce, the survival of intermediate risk patients were recalculated after excluding CAG-treated patients. The K-M curves were plotted to show the difference of OS and DFS between the low and high PLT groups. (**A**) 5-year OS rate (65.2±4.2% versus 41.5±3.7%, *P*<0.001). (**B**) 5-year DFS rate (61.2±4.6% vs 30.4±4.2%, *P*<0.001).
